# Supplementary material for: Assessing the Beneficial Effects of the Immunomodulatory Glycan LNFPIII on Gut Microbiota and Health in a Mouse Model of Gulf War Illness
Source: MDPI journal article supplement (doi:10.3390/ijerph17197081), 2020-09-27
Supplement: s1 [file s1]

**Supplementary Materials:** The following are available online at [www.mdpi.com/xxx](http://www.mdpi.com/xxx), Figure S1: title, Table S1: title, Video S1: title.

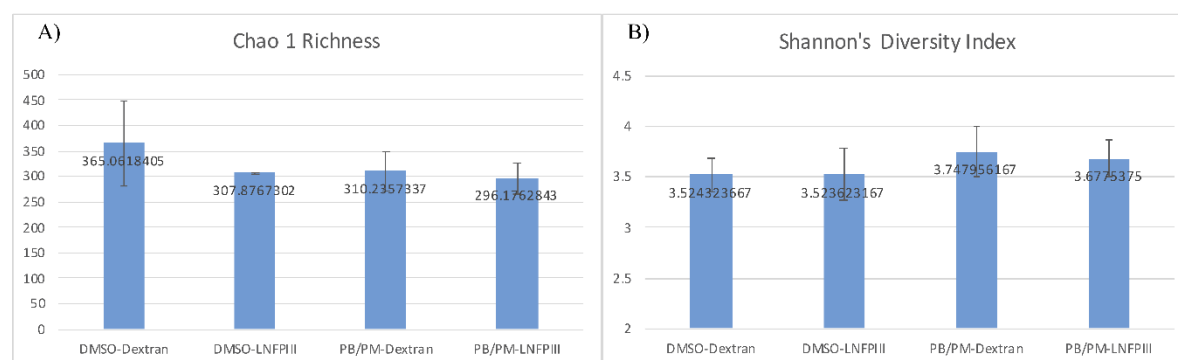

**Figure S1:** Changes in (A) richness (Chao1 richness) and (B) diversity (inverse of Simpson's diversity index) in the mice exposed to either DMSO-Dextran, DMSO-LNFP III, PB/PM-Dextran, and PB/PM-LNFP III in the long-term (chronic) study.

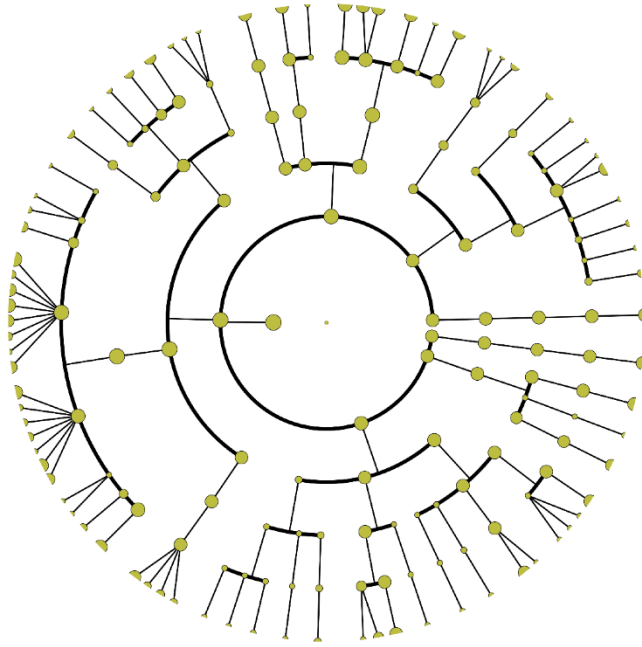

**Figure S2.** Linear discriminant analysis (LDA) effect size (LEfSe; Kruskal-Wallis [ $P < 0.05$ ]; Pairwise Wilcoxon [ $P < 0.05$ ]; logarithmic LDA score  $> 2.0$ ) of the fecal microbiota of mice exposed to either DMSO-Dextran or PB/PM-Dextran after 6 h post GWI exposures. As no taxa were altered, no groups are highlighted and no labels are provided.

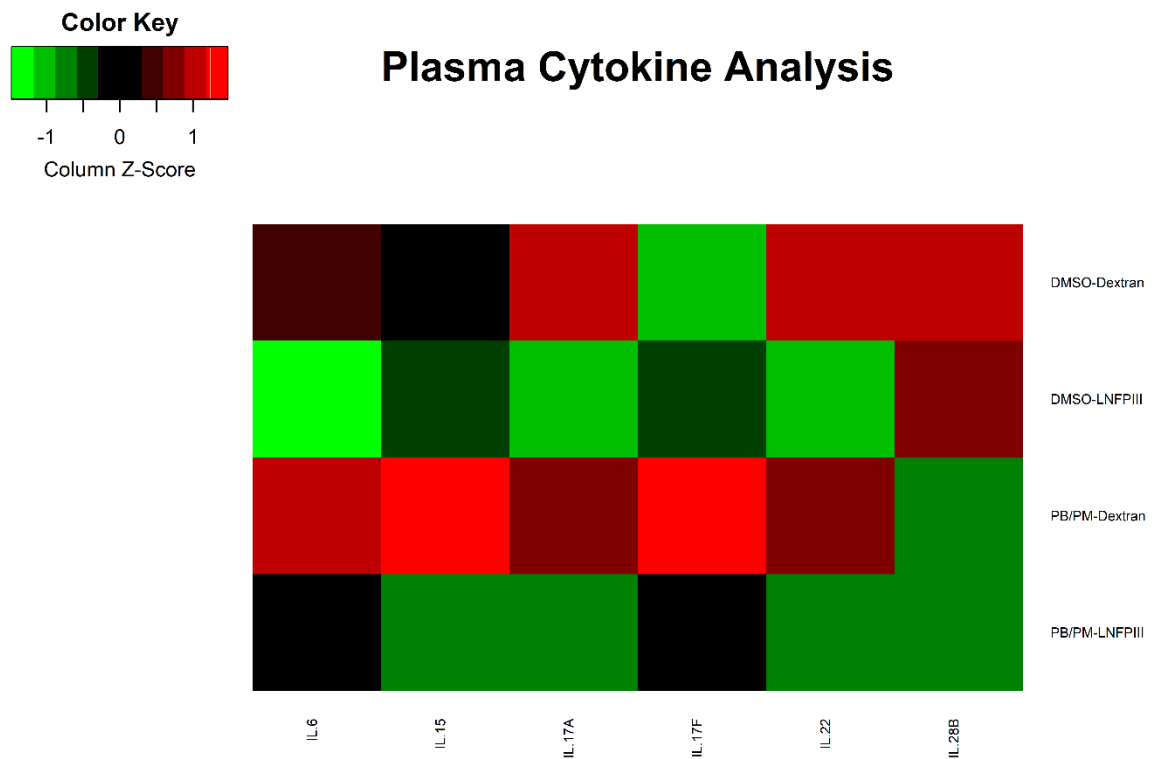

**Figure S3. Heat map of selected plasma cytokines.** Heat map representing selected cytokines in mice exposed to DMSO-Dextran (n=6), DMSO-LNFPIII (n=6), PB/PM-Dextran (n=7), and PB/PM-LNFPIII (n=7). Red and green color indicates increases and decreases, respectively, of plasma cytokine levels. Color key with Z-scores is located on the upper left.
